# Supplementary material for: Comparative Analysis of Virulence and Molecular Diversity of Puccinia striiformis f. sp. tritici Isolates Collected in 2016 and 2023 in the Western Region of China
Source: MDPI journal article supplement (doi:10.3390/genes15050542), 2024-04-25
Supplement: s1 [file s1]

**Table S1.** List of two sets of wheat differentials used to differentiate *Pst* pathotypes in China

| Yr single gene differentials |                 |              | Chinese differentials |                       |                                                               |
|------------------------------|-----------------|--------------|-----------------------|-----------------------|---------------------------------------------------------------|
| No.                          | Name            | Yr gene      | Code                  | Name                  | Yr gene                                                       |
| 1                            | Lemhi           | <i>Yr21</i>  | 1                     | Trigo Eureka          | <i>Yr6</i>                                                    |
| 2                            | Tyee            | <i>Yr76</i>  | 2                     | Fulhard               | Unknown                                                       |
| 3                            | CH223           | <i>Yr50</i>  | 3                     | Lutescens 128         | Unknown                                                       |
| 4                            | Vasu            | <i>Yr40</i>  | 4                     | Mentana               | Unknown                                                       |
| 5                            | CN19            | <i>Yr41</i>  | 5                     | Virgilio              | <i>YrVir1</i> , <i>YrVir2</i>                                 |
| 6                            | PI181434        | <i>Yr45</i>  | 6                     | Abbondanza            | Unknown                                                       |
| 7                            | Suwon 11        | <i>YrSu</i>  | 7                     | Early Premium         | Unknown                                                       |
| 8                            | Avs/ID0377s NIL | <i>Yr43</i>  | 8                     | Funo                  | <i>YrA</i> ,+                                                 |
| 9                            | Vocet R         | <i>YrA</i>   | 9                     | Danish 1              | <i>Yr3</i>                                                    |
| 10                           | TP1295          | <i>Yr25</i>  | 10                    | Jubilejina 2          | <i>YrJu1</i> , <i>YrJu2</i> , <i>YrJu3</i> , and <i>YrJu4</i> |
| 11                           | AvSYr1 NIL      | <i>Yr1</i>   | 11                    | Fengchan 3            | <i>Yr1</i>                                                    |
| 12                           | AvSYr5 NIL      | <i>Yr5</i>   | 12                    | Lovrin 13             | <i>Yr9</i> ,+                                                 |
| 13                           | AvSYr6 NIL      | <i>Yr6</i>   | 13                    | Kangyin 655           | <i>Yr1</i> , <i>YrKy1</i> , and <i>YrKy2</i>                  |
| 14                           | Minister        | <i>Yr3c</i>  | 14                    | Suwon 11              | <i>YrSu</i>                                                   |
| 15                           | AvSYr7 NIL      | <i>Yr7</i>   | 15                    | Zhong 4               | Unknown                                                       |
| 16                           | AvSYr8 NIL      | <i>Yr8</i>   | 16                    | Lovrin 10             | <i>Yr9</i>                                                    |
| 17                           | AvSYr9 NIL      | <i>Yr9</i>   | 17                    | Hybrid 46             | <i>Yr3b</i> and <i>YrH46</i>                                  |
| 18                           | AvSY24NIL       | <i>Yr24</i>  | 18                    | <i>T.spelta</i> album | <i>Yr5</i>                                                    |
| 19                           | AvSYr32NIL      | <i>Yr32</i>  | 19                    | Guinong 22            | <i>Yr10</i> and <i>Yr26</i>                                   |
| 20                           | PI331260        | <i>Yr64</i>  |                       |                       |                                                               |
| 21                           | AvSYr10NIL      | <i>Yr10</i>  |                       |                       |                                                               |
| 22                           | AvSYr15NIL      | <i>Yr15</i>  |                       |                       |                                                               |
| 23                           | AvSYr17NIL      | <i>Yr17</i>  |                       |                       |                                                               |
| 24                           | AvstZak NIL     | <i>Yr44</i>  |                       |                       |                                                               |
| 25                           | AvSYrSPNIL      | <i>YrSp</i>  |                       |                       |                                                               |
| 26                           | AvSYrTreslNIL   | <i>YrTr1</i> |                       |                       |                                                               |
| 27                           | AvSY26 NIL      | <i>Yr26</i>  |                       |                       |                                                               |
| 28                           | AvSY29NIL       | <i>Yr29</i>  |                       |                       |                                                               |
| 29                           | YrJu4 NIL       | <i>YrJu4</i> |                       |                       |                                                               |
| 30                           | YrKy2 NIL       | <i>YrKy2</i> |                       |                       |                                                               |
| 31                           | YrRes NIL       | <i>YrRes</i> |                       |                       |                                                               |

**Table S2.** Distribution of *Pst* pathotypes in western provinces of China

| No. | Pathotype <sup>a</sup>                           | Yunnan | Guizhou            | Sichuan | Gansu | Isolates/Mean | Frequency (%) |
|-----|--------------------------------------------------|--------|--------------------|---------|-------|---------------|---------------|
| 1   | <i>V2, 4, 8, 14</i>                              | (2)    | 1 (2) <sup>b</sup> | 1 (1)   |       | 7             | 5.0           |
| 2   | <i>V2, 4, 8, 12, 14, 16</i>                      |        |                    | 5       | (1)   | 6             | 4.2           |
| 3   | <i>V2, 8, 14</i>                                 | 1 (1)  | 1                  | 1 (1)   |       | 5             | 3.5           |
| 4   | <i>V0</i>                                        | (1)    | (2)                |         | (2)   | 5             | 3.5           |
| 5   | <i>V4, 14, 16</i>                                |        | 1                  | 3       |       | 4             | 2.8           |
| 6   | <i>V2, 14</i>                                    | (2)    | (1)                | (1)     |       | 4             | 2.8           |
| 7   | <i>V2, 8, 14, 19</i>                             | (1)    | (1)                | (2)     |       | 4             | 2.8           |
| 8   | <i>V2, 4, 8, 10, 14, 19</i>                      | 2      | (1)                | (1)     |       | 4             | 2.8           |
| 9   | <i>V2, V8</i>                                    |        |                    | (2)     | (2)   | 4             | 2.8           |
| 10  | <i>V2, 4, 14, 16</i>                             |        |                    | 3       |       | 3             | 2.1           |
| 11  | <i>V2, 3, 4, 6, 7, 8, 10, 11, 12, 14, 16, 19</i> | 1      |                    | 1       |       | 2             | 1.4           |
| 12  | <i>V2, 10</i>                                    | 1      |                    | 1       |       | 2             | 1.4           |
| 13  | <i>V3, 7, 10, 19</i>                             |        | 1                  | (1)     |       | 2             | 1.4           |
| 14  | <i>V2, 4, 8, 11, 14, 16</i>                      | 1      | 1                  |         |       | 2             | 1.4           |
| 15  | <i>V2, 8, 14, 16</i>                             | 2      |                    |         |       | 2             | 1.4           |
| 16  | <i>V2, 8, 19</i>                                 |        |                    | (2)     |       | 2             | 1.4           |
| 17  | <i>V2, 7, 8, 14, 19</i>                          | (1)    |                    |         | (1)   | 2             | 1.4           |
| 18  | <i>V2, 4, 7, 8, 14</i>                           | (1)    | 1                  |         |       | 2             | 1.4           |
| 19  | <i>V2</i>                                        |        | (1)                |         | (1)   | 2             | 1.4           |
| 20  | <i>V19</i>                                       |        |                    | (1)     |       | 1             | 0.70          |
| 21  | <i>V12</i>                                       |        | 1                  |         |       | 1             | 0.70          |
| 22  | <i>V14</i>                                       |        |                    | (1)     |       | 1             | 0.70          |
| 23  | <i>V8</i>                                        |        |                    | (1)     |       | 1             | 0.70          |
| 24  | <i>V2, 4</i>                                     |        |                    |         | (1)   | 1             | 0.70          |
| 25  | <i>V2, 3</i>                                     |        |                    | 1       |       | 1             | 0.70          |
| 26  | <i>V7, 14</i>                                    |        |                    |         | (1)   | 1             | 0.70          |
| 27  | <i>V8, 19</i>                                    | (1)    |                    |         |       | 1             | 0.70          |
| 28  | <i>V2, 8, 17</i>                                 |        | (1)                |         |       | 1             | 0.70          |
| 29  | <i>V7, 8, 10</i>                                 |        |                    |         | (1)   | 1             | 0.70          |
| 30  | <i>V2, 3, 14</i>                                 |        |                    |         | (1)   | 1             | 0.70          |
| 31  | <i>V2, 14, 16</i>                                |        |                    |         | (1)   | 1             | 0.70          |
| 32  | <i>V8, 10, 14</i>                                | 1      |                    |         |       | 1             | 0.70          |
| 33  | <i>V2, 4, 5, 14</i>                              |        | 1                  |         |       | 1             | 0.70          |
| 34  | <i>V4, 7, 8, 12</i>                              | (1)    |                    |         |       | 1             | 0.70          |
| 35  | <i>V6, 7, 8, 14</i>                              |        |                    |         | (1)   | 1             | 0.70          |
| 36  | <i>V2, 3, 7, 10</i>                              |        |                    |         | (1)   | 1             | 0.70          |
| 37  | <i>V2, 4, 8, 16</i>                              | (1)    |                    |         |       | 1             | 0.70          |
| 38  | <i>V2, 8, 10, 14</i>                             | (1)    |                    |         |       | 1             | 0.70          |
| 39  | <i>V2, 8, 10, 19</i>                             |        |                    | (1)     |       | 1             | 0.70          |
| 40  | <i>V2, 4, 14, 19</i>                             |        |                    | (1)     |       | 1             | 0.70          |
| 41  | <i>V2, 7, 8, 14</i>                              | (1)    |                    |         |       | 1             | 0.70          |
| 42  | <i>V2, 5, 7, 19</i>                              |        |                    | (1)     |       | 1             | 0.70          |
| 43  | <i>V2, 3, 7, 13, 16</i>                          |        |                    |         | (1)   | 1             | 0.70          |
| 44  | <i>V2, 7, 8, 13, 19</i>                          |        | (1)                |         |       | 1             | 0.70          |
| 45  | <i>V2, 4, 6, 8, 14</i>                           | (1)    |                    |         |       | 1             | 0.70          |
| 46  | <i>V2, 6, 10, 14, 19</i>                         |        |                    |         | (1)   | 1             | 0.70          |
| 47  | <i>V2, 4, 8, 10, 14</i>                          |        |                    | 1       |       | 1             | 0.70          |
| 48  | <i>V2, 4, 8, 10, 11</i>                          | (1)    |                    |         |       | 1             | 0.70          |
| 49  | <i>V2, 6, 8, 16, 19</i>                          |        |                    | (1)     |       | 1             | 0.70          |
| 50  | <i>V2, 7, 11, 14, 19</i>                         | (1)    |                    |         |       | 1             | 0.70          |
| 51  | <i>V2, 3, 4, 8, 16</i>                           |        |                    |         | (1)   | 1             | 0.70          |
| 52  | <i>V2, 4, 11, 12, 14</i>                         | (1)    |                    |         |       | 1             | 0.70          |
| 53  | <i>V2, 8, 12, 14, 19</i>                         |        |                    | (1)     |       | 1             | 0.70          |
| 54  | <i>V2, 3, 4, 10, 11, 12</i>                      |        |                    | (1)     |       | 1             | 0.70          |
| 55  | <i>V2, 3, 4, 8, 10, 14</i>                       |        |                    |         | (1)   | 1             | 0.70          |

Continued Table S2

| No.   | Pathotype                                              | Yunnan  | Guizhou | Sichuan | Gansu | Isolate/Mean | Frequency (%) |
|-------|--------------------------------------------------------|---------|---------|---------|-------|--------------|---------------|
| 56    | V2, 3, 4, 8, 14, 19                                    |         |         |         | (1)   | 1            | 0.70          |
| 57    | V3, 4, 8, 11, 14, 19                                   | (1)     |         |         |       | 1            | 0.70          |
| 58    | V2, 3, 6, 7, 8, 16                                     |         |         | (1)     |       | 1            | 0.70          |
| 59    | V3, 4, 7, 8, 10, 14                                    |         |         | (1)     |       | 1            | 0.70          |
| 60    | V2, 4, 7, 8, 12, 14                                    |         |         |         | (1)   | 1            | 0.70          |
| 61    | V2, 3, 4, 7, 8, 14                                     | (1)     |         |         |       | 1            | 0.70          |
| 62    | V2, 4, 7, 12, 14, 17                                   |         |         |         | (1)   | 1            | 0.70          |
| 63    | V2, 8, 10, 11, 17, 19                                  |         |         |         | (1)   | 1            | 0.70          |
| 64    | V2, 3, 4, 11, 12, 14                                   |         |         | 1       |       | 1            | 0.70          |
| 65    | V1, 2, 4, 6, 8, 10, 14                                 | (1)     |         |         |       | 1            | 0.70          |
| 66    | V2, 4, 6, 7, 8, 10, 14                                 |         |         | 1       |       | 1            | 0.70          |
| 67    | V2, 4, 7, 8, 10, 11, 14                                |         |         | 1       |       | 1            | 0.70          |
| 68    | V1, 2, 3, 4, 7, 8, 16                                  | (1)     |         |         |       | 1            | 0.70          |
| 69    | V2, 4, 6, 8, 12, 14, 16                                | 1       |         |         |       | 1            | 0.70          |
| 70    | V2, 4, 6, 8, 11, 14, 16,                               | 1       |         |         |       | 1            | 0.70          |
| 71    | V2, 4, 6, 7, 8, 14, 16,                                |         |         |         | (1)   | 1            | 0.70          |
| 72    | V2, 4, 8, 11, 12, 14, 16, 17                           |         | 1       |         |       | 1            | 0.70          |
| 73    | V2, 3, 6, 8, 11, 14, 16, 18                            |         |         |         | (1)   | 1            | 0.70          |
| 74    | V2, 4, 6, 7, 8, 12, 14, 16                             | 1       |         |         |       | 1            | 0.70          |
| 75    | V2, 3, 4, 10, 11, 12, 14, 16                           |         |         | 1       |       | 1            | 0.70          |
| 76    | V2, 3, 4, 8, 10, 14, 16, 19                            |         |         | 1       |       | 1            | 0.70          |
| 77    | V2, 3, 4, 7, 10, 13, 14, 19                            |         | 1       |         |       | 1            | 0.70          |
| 78    | V2, 4, 6, 8, 9, 12, 14, 16                             | (1)     |         |         |       | 1            | 0.70          |
| 79    | V2, 4, 6, 8, 11, 12, 14, 16                            |         |         | 1       |       | 1            | 0.70          |
| 80    | V2, 4, 7, 8, 10, 14, 16, 19                            |         |         |         | (1)   | 1            | 0.70          |
| 81    | V2, 3, 7, 10, 12, 13, 14, 19                           | 1       |         |         |       | 1            | 0.70          |
| 82    | V2, 3, 4, 8, 10, 16, 17, 19                            | 1       |         |         |       | 1            | 0.70          |
| 83    | V1, 6, 7, 8, 9, 12, 14, 16, 17                         | 1       |         |         |       | 1            | 0.70          |
| 84    | V2, 3, 4, 7, 8, 9, 10, 11, 14                          |         |         | 1       |       | 1            | 0.70          |
| 85    | V2, 3, 4, 6, 7, 8, 10, 14, 16,                         |         |         |         | (1)   | 1            | 0.70          |
| 86    | V2, 4, 5, 6, 8, 12, 14, 16, 17                         |         |         |         | (1)   | 1            | 0.70          |
| 87    | V2, 3, 4, 8, 9, 10, 13, 14, 16                         | 1       |         |         |       | 1            | 0.70          |
| 88    | V2, 3, 4, 5, 7, 8, 10, 14, 17, 19                      |         | 1       |         |       | 1            | 0.70          |
| 89    | V2, 4, 5, 6, 7, 8, 11, 12, 14, 16                      |         |         | (1)     |       | 1            | 0.70          |
| 90    | V2, 3, 7, 9, 11, 13, 16, 17, 18, 19                    | 1       |         |         |       | 1            | 0.70          |
| 91    | V2, 4, 5, 7, 9, 11, 12, 14, 16, 17                     |         |         | 1       |       | 1            | 0.70          |
| 92    | V2, 3, 4, 7, 8, 10, 12, 13, 14, 16                     |         |         |         | (1)   | 1            | 0.70          |
| 93    | V2, 3, 4, 6, 7, 8, 9, 10, 11, 14, 16                   |         |         | 1       |       | 1            | 0.70          |
| 94    | V2, 3, 4, 6, 7, 8, 9, 10, 14, 16, 19                   |         |         | 1       |       | 1            | 0.70          |
| 95    | V2, 3, 4, 6, 7, 8, 9, 10, 12, 13, 14, 16               |         |         | 1       |       | 1            | 0.70          |
| 96    | V2, 3, 4, 5, 7, 8, 9, 10, 11, 12, 14, 16               |         |         | 1       |       | 1            | 0.70          |
| 97    | V2, 3, 4, 5, 6, 7, 8, 9, 11, 12, 14, 16, 17, 19        | 1       |         |         |       | 1            | 0.70          |
| 98    | V1, 2, 3, 4, 5, 6, 7, 8, 9, 10, 11, 12, 13, 14, 16, 17 | 1       |         |         |       | 1            | 0.70          |
| Total |                                                        | 19 (23) | 11 (10) | 29 (23) | (28)  | 143          | 100           |
| $H^c$ |                                                        | 3.6     | 2.8     | 3.5     | 3.6   | 3.4          |               |

<sup>a</sup> Corresponding virulence (V1-V19) to the 19 Chinese differentials: V0 = avirulent to all differentials; V1 = Trigo Eureka (Yr6); V2 = Fulhard (unknown); V3 = Lutescens128 (unknown); V4 = Mentana (unknown); V5 = Virgilio (YrVir1 and YrVir2); V6 = Abbondanza (unknown); V7 = Early premium (unknown); V8 = Funo (YrA,+); V9 = Danish 1 (Yr3); V10 = Jubilejina 2 (YrJu1, YrJu2, YrJu3 and YrJu4); V11 = Fengchan3 (Yr1); V12 = Lovrin 13 (Yr9,+); V13 = Kangyin 655 (Yr1, YrKy1 and YrKy2); V14 = Suwon 11 (YrSu); V15 = Zhong 4 (unknown); V16 = Lovrin 10 (Yr9); V17 = Hybrid 46 (Yr3b and Yr4b); V18 = *T. spelta* var album (Yr5); and V19 = Guinong 22 (Yr26). <sup>b</sup> old and new isolates are shown inside and outside parentheses, respectively. <sup>c</sup> Shannon-Wiener pathotype diversity index ( $H$ ) for the 143 *Pst* isolates.
